# Supplementary material
Source: PubMed Central journal article supplement (PMC5454257)
Supplement: rspb20170054supp1.pdf [file rspb20170054supp1.pdf]

## Supplementary Table 1

| FemaleID      | Experience      | NestID | Number of birds in clutch | Number of male siblings in clutch | Sister in clutch also in study? |
|---------------|-----------------|--------|---------------------------|-----------------------------------|---------------------------------|
| blu54grn8     | normally-reared | ZF1    | 3                         | 1                                 | n                               |
| blk76prp17    | normally-reared | ZF2    | 3                         | 1                                 | n                               |
| bl13y5        | normally-reared | ZF3    | 3                         | 1                                 | n                               |
| blu24y4       | normally-reared | ZF3    | 3                         | 0                                 | n                               |
| blu56prp9     | normally-reared | ZF4    | 2                         | 1                                 | n                               |
| bl18prp1      | normally-reared | ZF4    | 5                         | 1                                 | n                               |
| y11br50       | normally-reared | ZF5    | 3                         | 0                                 | n                               |
| gray          | normally-reared | ZF6    | 1                         | 0                                 | n                               |
| blk10wht70    | normally-reared | vendor | n/a                       | n/a                               | n/a                             |
| blk91         | normally-reared | vendor | n/a                       | n/a                               | n/a                             |
| blu50         | normally-reared | vendor | n/a                       | n/a                               | n/a                             |
| w15br86       | normally-reared | vendor | n/a                       | n/a                               | n/a                             |
| y28w28        | song-naïve      | N2     | 2                         | 1                                 | n                               |
| y99y100       | song-naïve      | N2     | 2                         | 1                                 | n                               |
| y1w1          | song-naïve      | N3     | 4                         | 2                                 | n                               |
| w27y7         | song-naïve      | N5     | 1                         | 0                                 | n                               |
| y41w51        | song-naïve      | N5     | 2                         | 0                                 | n                               |
| <b>w56y66</b> | song-naïve      | N5     | 4                         | 1                                 | <b>y</b>                        |
| <b>w57y67</b> | song-naïve      | N5     | 4                         | 1                                 | <b>y</b>                        |
| y94y54        | song-naïve      | N10    | 2                         | 0                                 | n                               |
| y83y84        | song-naïve      | N10    | 3                         | 1                                 | n                               |
| <b>y63w19</b> | song-naïve      | N12    | 4                         | 1                                 | <b>y</b>                        |
| <b>y64w20</b> | song-naïve      | N12    | 4                         | 1                                 | <b>y</b>                        |
| y96y26        | song-naïve      | N12    | 4                         | 2                                 | n                               |
| y23w13        | song-naïve      | N14    | 2                         | 1                                 | n                               |
| y43w53        | song-naïve      | N15    | 2                         | 0                                 | n                               |
| y53w82        | song-naïve      | N15    | 2                         | 0                                 | n                               |
