# Supplementary material
Source: PubMed Central journal article supplement (PMC5454257)
Supplement: rspb20170054supp2.pdf [file rspb20170054supp2.pdf]

## Supplementary Table 2

|                                                                     | DF, DFDen | F Ratio | p-value |
|---------------------------------------------------------------------|-----------|---------|---------|
| <b>Effects of nest</b>                                              |           |         |         |
| <b>Model</b>                                                        |           |         |         |
| Nest                                                                | 6,8.6     | 1.34    | 0.3352  |
| Male ID                                                             | 13,101.70 | 1.39    | 0.1768  |
| Nest X Male ID                                                      | 78,100.60 | 0.99    | 0.5147  |
| Female ID (random variable)<br>dependent variable: preference score |           |         |         |
| <b>Effects of sequential testing</b>                                |           |         |         |
| <i>First day</i>                                                    |           |         |         |
| <b>Model</b>                                                        |           |         |         |
| Experience                                                          | 1,23      | 0.94    | 0.3415  |
| Test Number (first,last; repeated variable)                         | 1,23      | 0.25    | 0.6191  |
| Test Number X Experience                                            | 1,23      | 1.61    | 0.2179  |
| dependent variable: preference score                                |           |         |         |
| <i>Last day</i>                                                     |           |         |         |
| <b>Model</b>                                                        |           |         |         |
| Experience                                                          | 1,23      | 0.32    | 0.5758  |
| Test Number (first,last; repeated variable)                         | 1,23      | 1.41    | 0.2478  |
| Test Number X Experience                                            | 1,23      | 0.51    | 0.4842  |
| dependent variable: preference score                                |           |         |         |
