# Supplementary material
Source: PubMed Central journal article supplement (PMC5454257)
Supplement: rspb20170054supp3.pdf [file rspb20170054supp3.pdf]

|                                                                        | DF, DFDen | F Ratio | p-value | Rsquare |
|------------------------------------------------------------------------|-----------|---------|---------|---------|
| <b>Effects of rearing condition and male ID on song preference</b>     |           |         |         |         |
| <b>Model</b>                                                           |           |         |         |         |
| Rearing                                                                | 1, 284    | 4.10    | 0.0439  |         |
| Male ID                                                                | 13, 284   | 1.49    | 0.1204  |         |
| Rearing x Male ID                                                      | 13, 284   | 1.58    | 0.0895  |         |
| Female ID (random variable)                                            |           |         |         |         |
| Dependent variable: preference score                                   |           |         |         |         |
| <b>Song Features and Preference</b>                                    |           |         |         |         |
| <i>Social modulation of the CV of the fundamental frequency (FFcv)</i> |           |         |         |         |
| <b>Model</b>                                                           |           |         |         |         |
| Rearing                                                                | 1,27      | 4.74    | 0.0502  |         |
| % difference in FFcv                                                   | 1,27      | 0.01    | 0.9366  |         |
| Rearing X % difference in FFcv                                         | 1,27      | 8.56    | 0.0127  |         |
| Male ID (random variable)                                              |           |         |         |         |
| Dependent variable: preference score                                   |           |         |         |         |
| <b>Correlations</b>                                                    |           |         |         |         |
| normally-reared (%diff FFcv X preference score)                        | 1,12      | 2.51    | 0.1391  | 0.17    |
| song-naïve (%diff FFcv X preference score)                             | 1,12      | 4.05    | 0.0671  | 0.25    |
| <i>Social modulation of the entropy of the spectral density (ESD)</i>  |           |         |         |         |
| <b>Model</b>                                                           |           |         |         |         |
| Rearing                                                                | 1,27      | 4.93    | 0.0464  |         |
| % difference in ESD                                                    | 1,27      | 0.96    | 0.3457  |         |
| Rearing X % difference in ESD                                          | 1,27      | 9.35    | 0.0098  |         |
| Male ID (random variable)                                              |           |         |         |         |
| Dependent variable: preference score                                   |           |         |         |         |
| <b>Correlations</b>                                                    |           |         |         |         |
| normally-reared (% diff ESD X preference score)                        | 1,27      | 6.28    | 0.0276  | 0.34    |
| song-naïve (% diff ESD X preference score)                             | 1,27      | 1.27    | 0.2825  | 0.10    |
| <i>Social modulation of introductory notes</i>                         |           |         |         |         |
| <b>Model</b>                                                           |           |         |         |         |
| Rearing                                                                | 1,27      | 2.81    | 0.1191  |         |
| % difference in introductory notes                                     | 1,27      | 1.24    | 0.2868  |         |
| Rearing X % difference in introductory notes                           | 1,27      | 2.71    | 0.1245  |         |
| Male ID (random variable)                                              |           |         |         |         |
| Dependent variable: preference score                                   |           |         |         |         |
| <i>Social modulation of motif number</i>                               |           |         |         |         |
| <b>Model</b>                                                           |           |         |         |         |
| Rearing                                                                | 1,27      | 2.59    | 0.1338  |         |
| % difference in number of motifs                                       | 1,27      | 0.34    | 0.5686  |         |
| Rearing X % difference in number of motifs                             | 1,27      | 1.52    | 0.2419  |         |
| Male ID (random variable)                                              |           |         |         |         |
| Dependent variable: preference score                                   |           |         |         |         |
| <i>Social modulation of song tempo</i>                                 |           |         |         |         |
| <b>Model</b>                                                           |           |         |         |         |
| Rearing                                                                | 1,27      | 2.33    | 0.1531  |         |
| % difference in song tempo                                             | 1,27      | 0.32    | 0.5826  |         |
| Rearing X % difference in song tempo                                   | 1,27      | 0.16    | 0.6981  |         |
| Male ID (random variable)                                              |           |         |         |         |
| Dependent variable: preference score                                   |           |         |         |         |
| <i>Social modulation of mean fundamental frequency (FFmean)</i>        |           |         |         |         |
| <b>Model</b>                                                           |           |         |         |         |
| Rearing                                                                | 1,27      | 3.02    | 0.0953  |         |
| % difference in FFmean                                                 | 1,27      | 0.01    | 0.9219  |         |
| Rearing X % difference in FFmean                                       | 1,27      | 0.01    | 0.9131  |         |
| Male ID (random variable)                                              |           |         |         |         |
| Dependent variable: preference score                                   |           |         |         |         |
| <i>Social modulation of spectrotemporal entropy (STE)</i>              |           |         |         |         |
| <b>Model</b>                                                           |           |         |         |         |
| Rearing                                                                | 1,27      | 4.93    | 0.0464  |         |
| % difference in STE                                                    | 1,27      | 0.96    | 0.3457  |         |
| Rearing X % difference in STE                                          | 1,27      | 9.35    | 0.0098  |         |
| Male ID (random variable)                                              |           |         |         |         |
| Dependent variable: preference score                                   |           |         |         |         |
